# Supplementary material for: Constructing high energy density non-aqueous Li-ion capacitors using monoclinic TiO2-B nanorods as insertion host
Source: Royal Society of Chemistry journal article supplement (doi:10.1039/c3ta11103b), 2013-01-01
Supplement: c3ta11103b.pdf [file c3ta11103b.pdf]

Supplementary information

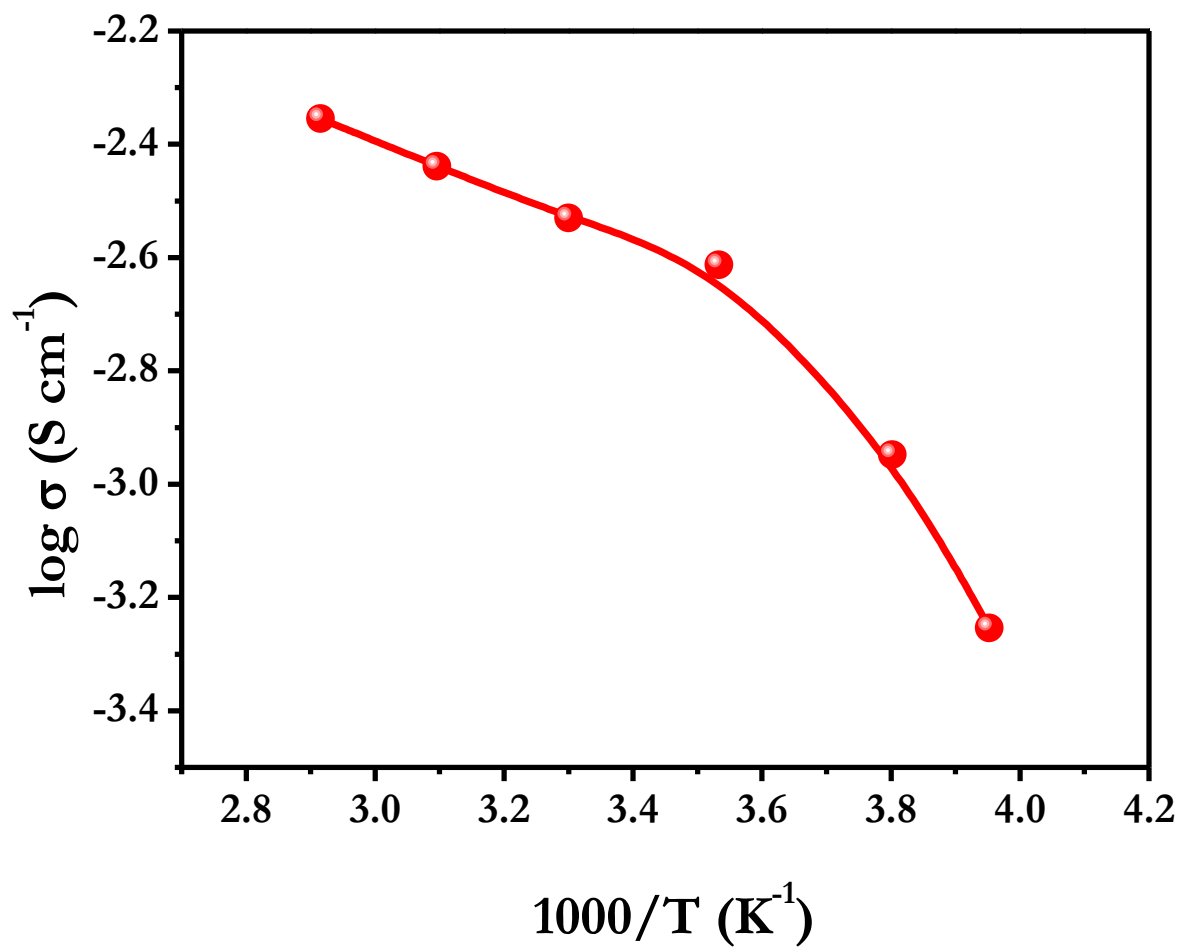

**Figure S1.** Temperature dependence of ionic conductivity measured using blocking electrodes (stainless steel/PVdF-HFP membrane/stainless steel)
